# Supplementary material for: A cationic microporous metal–organic framework for highly selective separation of small hydrocarbons at room temperature
Source: Royal Society of Chemistry journal article supplement (doi:10.1039/c3ta12086d), 2013-01-01
Supplement: c3ta12086d.pdf [file c3ta12086d.pdf]

## Supporting Information for the manuscript

# A Cationic Microporous Metal-Organic Framework for Highly Selective Separation of Small Hydrocarbons at Room Temperature

Hui Xu<sup>a</sup>, Jianfeng Cai<sup>a</sup>, Shengchang Xiang<sup>d</sup>, Zhangjing Zhang<sup>d</sup>, Chuande Wu<sup>e</sup>, Xiangtang Rao<sup>a</sup>, Yuanjing Cui<sup>a</sup>, Yu Yang<sup>a</sup>, Rajamani Krishna<sup>\*c</sup>, Banglin Chen<sup>\*ab</sup> and Guodong Qian<sup>\*a</sup>

<sup>a</sup>State Key Laboratory of Silicon Materials, Cyrus Tang Center for Sensor Materials and Applications, Department of Materials Science & Engineering, Zhejiang University, Hangzhou 310027, China. E-mail: gdqian@zju.edu.cn

<sup>b</sup>Department of Chemistry, University of Texas at San Antonio, One UTSA Circle, San Antonio, Texas 78249-0698, USA. E-mail: banglin.chen@utsa.edu; Fax: (+1) 210-458-7428

<sup>c</sup>Van't Hoff Institute for Molecule Sciences, University of Amsterdam Science Park 904, 1098 XH Amsterdam (The Netherlands). E-mail: r.krishna@uva.nl

<sup>d</sup>College of Chemistry and Materials, Fujian Normal University, 3 Shangsan Road, Cangshang Region, Fuzhou, 350007, China

<sup>e</sup>Department of Chemistry, Zhejiang University, Hangzhou 310027, China

\*Corresponding Authors. E-mail: gdqian@zju.edu.cn, banglin.chen@utsa.edu, r.krishna@uva.nl

## 1. Fitting of pure component isotherms

The measured experimental data on pure component isotherms for **ZJU-48a**, were first converted to absolute loading using the Peng-Robinson equation of state for estimation of the fluid densities. The pure component isotherm data for CH<sub>4</sub>, C<sub>2</sub>H<sub>2</sub>, C<sub>2</sub>H<sub>4</sub>, and C<sub>2</sub>H<sub>6</sub>, expressed in terms of *absolute* loadings, were fitted with the Langmuir isotherm model

$$q = q_{A,sat} \frac{b_A P}{1 + b_A P} \quad (1)$$

with  $T$ -dependent parameter  $b_A$

$$b_A = b_{A0} \exp\left(\frac{E_A}{RT}\right) \quad (2)$$

The fitted parameter values are presented in Table S1. Figure S4 presents IAST calculations of the component molar loadings in equilibrium with an *equimolar* CH<sub>4</sub>/C<sub>2</sub>H<sub>2</sub>/C<sub>2</sub>H<sub>4</sub>/C<sub>2</sub>H<sub>6</sub> mixture as a function of the total bulk gas phase pressure at 296K.

## 2. Adsorption selectivity

Let us first consider the separation of CH<sub>4</sub> from a mixture containing C<sub>2</sub> hydrocarbons. Rather than restrict our investigations to just binary CH<sub>4</sub>/C<sub>2</sub>H<sub>6</sub> mixtures, we consider the selective adsorption of C<sub>2</sub> hydrocarbons from an equimolar 4-component CH<sub>4</sub>/C<sub>2</sub>H<sub>2</sub>/C<sub>2</sub>H<sub>4</sub>/C<sub>2</sub>H<sub>6</sub> mixture. The choice of such a mixture is dictated by the fact that such mixture separations are encountered in the process oxidative coupling of methane for producing ethene.

We define the *adsorption selectivity*, defined by

$$S_{ads} = \frac{q_1/q_2}{p_1/p_2} \quad (3)$$

Here  $p_1$  and  $p_2$  are taken to be the partial pressures of  $C_2H_6$  and  $CH_4$ , respectively. The  $q_1$  and  $q_2$  are the molar loadings in the adsorbed phase,  $C_2H_6$  and  $CH_4$ , respectively, expressed in mol per kg of adsorbent material.

### 3. Isostatic heat of adsorption

The isosteric heat of adsorption,  $Q_{st}$ , defined as

$$Q_{st} = RT^2 \left( \frac{\partial \ln p}{\partial T} \right)_q \quad (4)$$

were determined using the pure component isotherm fits.

### 4. Breakthrough in fixed bed adsorber unit

In demonstrate the separation performance of a pressure swing adsorption (PSA) unit, we performed breakthrough calculations with step-input of an equimolar  $CH_4/C_2H_2/C_2H_4/C_2H_6$  mixture. The  $x$ -axis in Figure 5 is a dimensionless time,  $\tau$ , defined by dividing the actual time,  $t$ , by the characteristic time,  $\frac{L\varepsilon}{u}$ .

Table S1. Langmuir isotherm parameter fits for **ZJU-48a**

|          | $q_{A,sat}$<br>mol kg <sup>-1</sup> | $b_{A0}$<br>Pa <sup>-1</sup> | $E_A$<br>kJ mol <sup>-1</sup> |
|----------|-------------------------------------|------------------------------|-------------------------------|
| $C_2H_2$ | 6.9                                 | $9.6 \times 10^{-9}$         | 15.6                          |
| $C_2H_4$ | 6.9                                 | $4.87 \times 10^{-10}$       | 21.7                          |
| $C_2H_6$ | 9                                   | $2.91 \times 10^{-11}$       | 28                            |
| $CH_4$   | 3.2                                 | $4.06 \times 10^{-9}$        | 14                            |

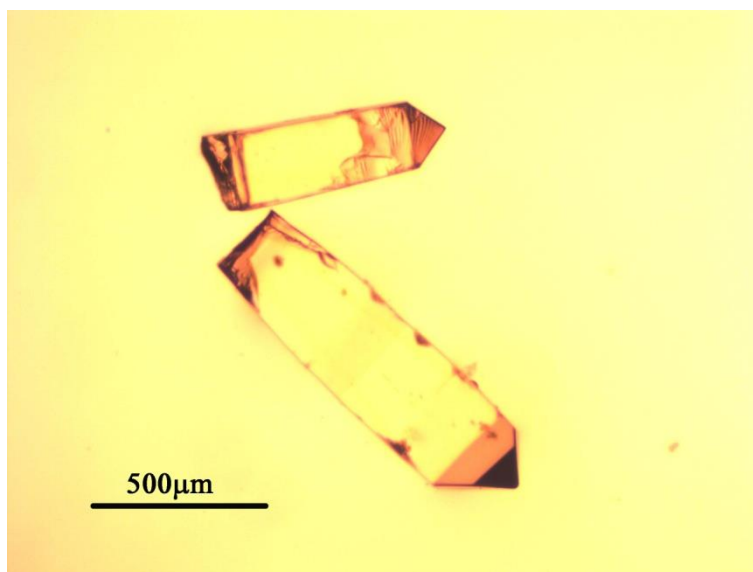

**Figure S1** Fluorescent microscope images of **ZJU-48** crystals illuminated with visible light.

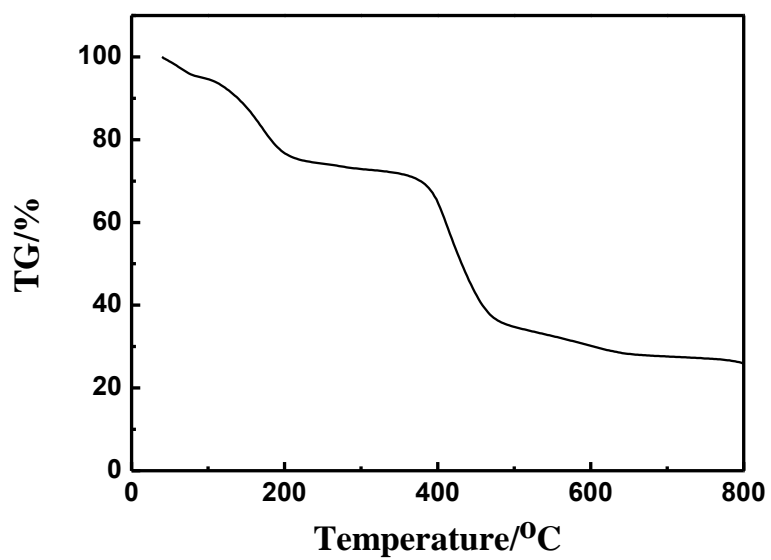

**Figure S2.** TG of **ZJU-48**

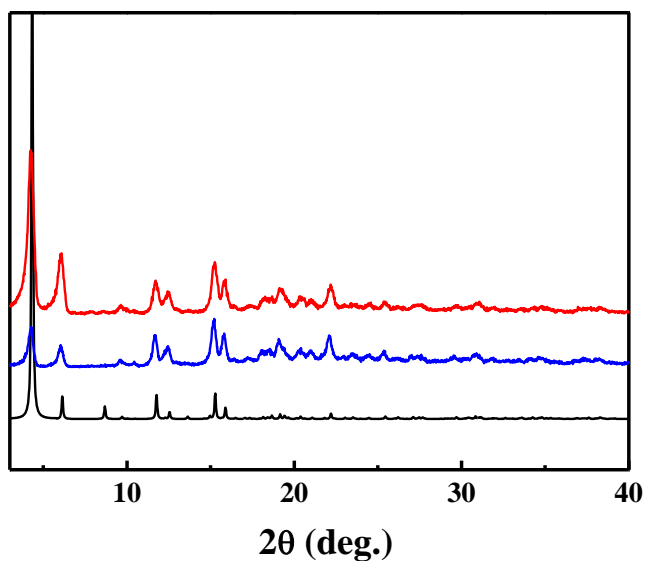

**Figure S3.** PXRD patterns of **ZJU-48** (simulated: black; as-synthesized: blue; activated at 0 °C in vacuum for 12h: red).

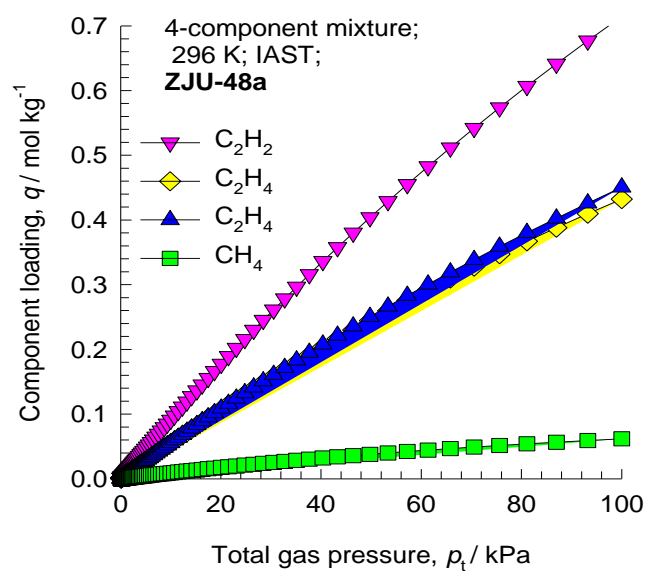

**Figure S4.** IAST calculations of the component molar loadings in equilibrium with an *equimolar*  $\text{CH}_4/\text{C}_2\text{H}_2/\text{C}_2\text{H}_4/\text{C}_2\text{H}_6$  mixture at total bulk gas phase at 296 K.

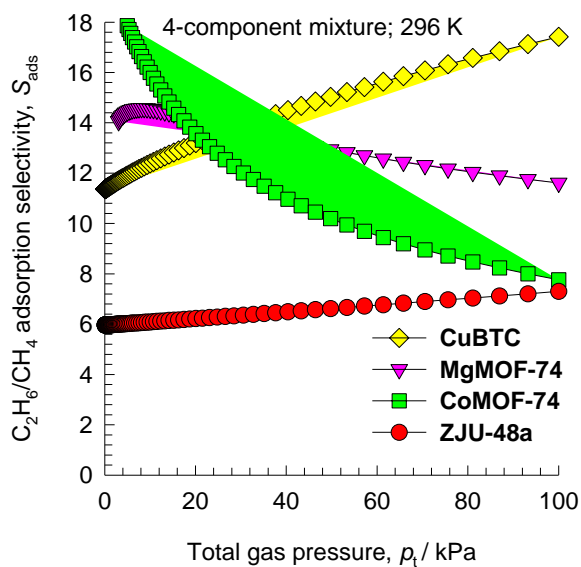

**Figure S5.** IAST calculations of the  $C_2H_6/CH_4$  adsorption selectivity of four MOFs for adsorption from an equimolar  $CH_4/C_2H_2/C_2H_4/C_2H_6$  mixture at total bulk gas phase at 296 K.

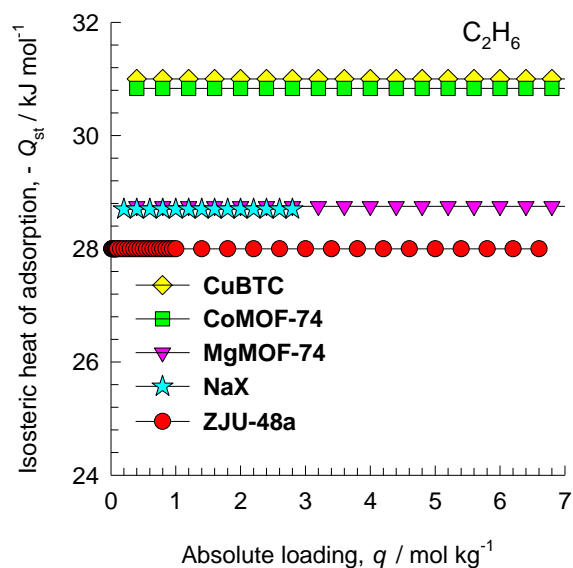

**Figure S6** The isosteric heats of adsorption of different porous materials for  $C_2H_6$ .

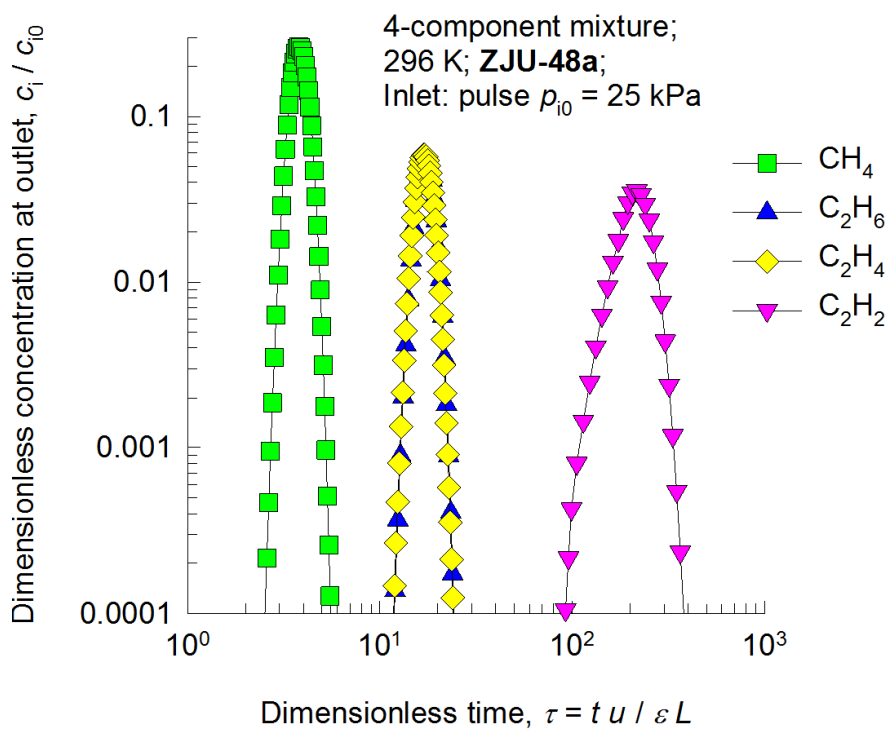

**Figure S7.** Pulse chromatographic simulations for separation of an *equimolar* 4-component CH<sub>4</sub>/C<sub>2</sub>H<sub>2</sub>/C<sub>2</sub>H<sub>4</sub>/C<sub>2</sub>H<sub>6</sub> mixture with **ZJU-48a** as adsorbent material. A pulse of the equimolar mixture is injected for 10 s at the start of the process, and subsequently the adsorbed components are desorbed by use of purge inert gas.

## 5. References

- (1) Myers, A. L.; Prausnitz, J. M. Thermodynamics of mixed gas adsorption, *A.I.Ch.E.J.* **1965**, *11*, 121-130.
